# Supplementary material
Source: publisher site journal article supplement (https://www.dovepress.com/article/228497)
Supplement: Supplementary file 1 [file get_supplementary_file.php]

KNHANES (2007-2012)

N=43,874

COPD: age 40 ≥; FEV1/FVC <0.7; FEV1≥ 50% predicted; records of smoking history

N= 2164 (MetS=675, no MetS=1489)

2012

N=436

2011

N=374

2007

N=214

2009

N=410

2010

N=309

2008

N=421

December 2012

January 2007

December 2012

January 2007

December 2012

January 2007

NHI

December 2012

January 2007

December 2012

December 2012

January 2007

January 2007

**Figure S1.** Study flow diagram of participants. Vertical arrows in the biggest rectangle box indicate the year of enrollment to KNHANES. Dashed arrows in the biggest rectangle box indicate the retrospective review of NHI data and solid arrows in the biggest rectangle box indicate the prospective assessment of NHI data. KNHANES, Korean National Health and Nutrition Examination Survey; COPD, chronic obstructive pulmonary disease; MetS, metabolic syndrome; NHI, National Health Insurance.

**Figure S2.** Pooled prevalence of MetS components in early COPD based on KNHANES database.

TG, trigcyeride; HDL-C, high density lipoprotein cholesterol; MetS, metabolic syndrome; COPD, chronic obstructive pulmonary disease; KNHANES, Korean National Health and Nutrition Examination Survey.
